# Supplementary material for: Transcriptomic and metabolic responses of Calotropis procera to salt and drought stress
Source: PubMed Central journal article supplement (PMC5716246; doi:10.1186/s12870-017-1155-7), 2017-12-04

# Up Regulated

# Down Regulated

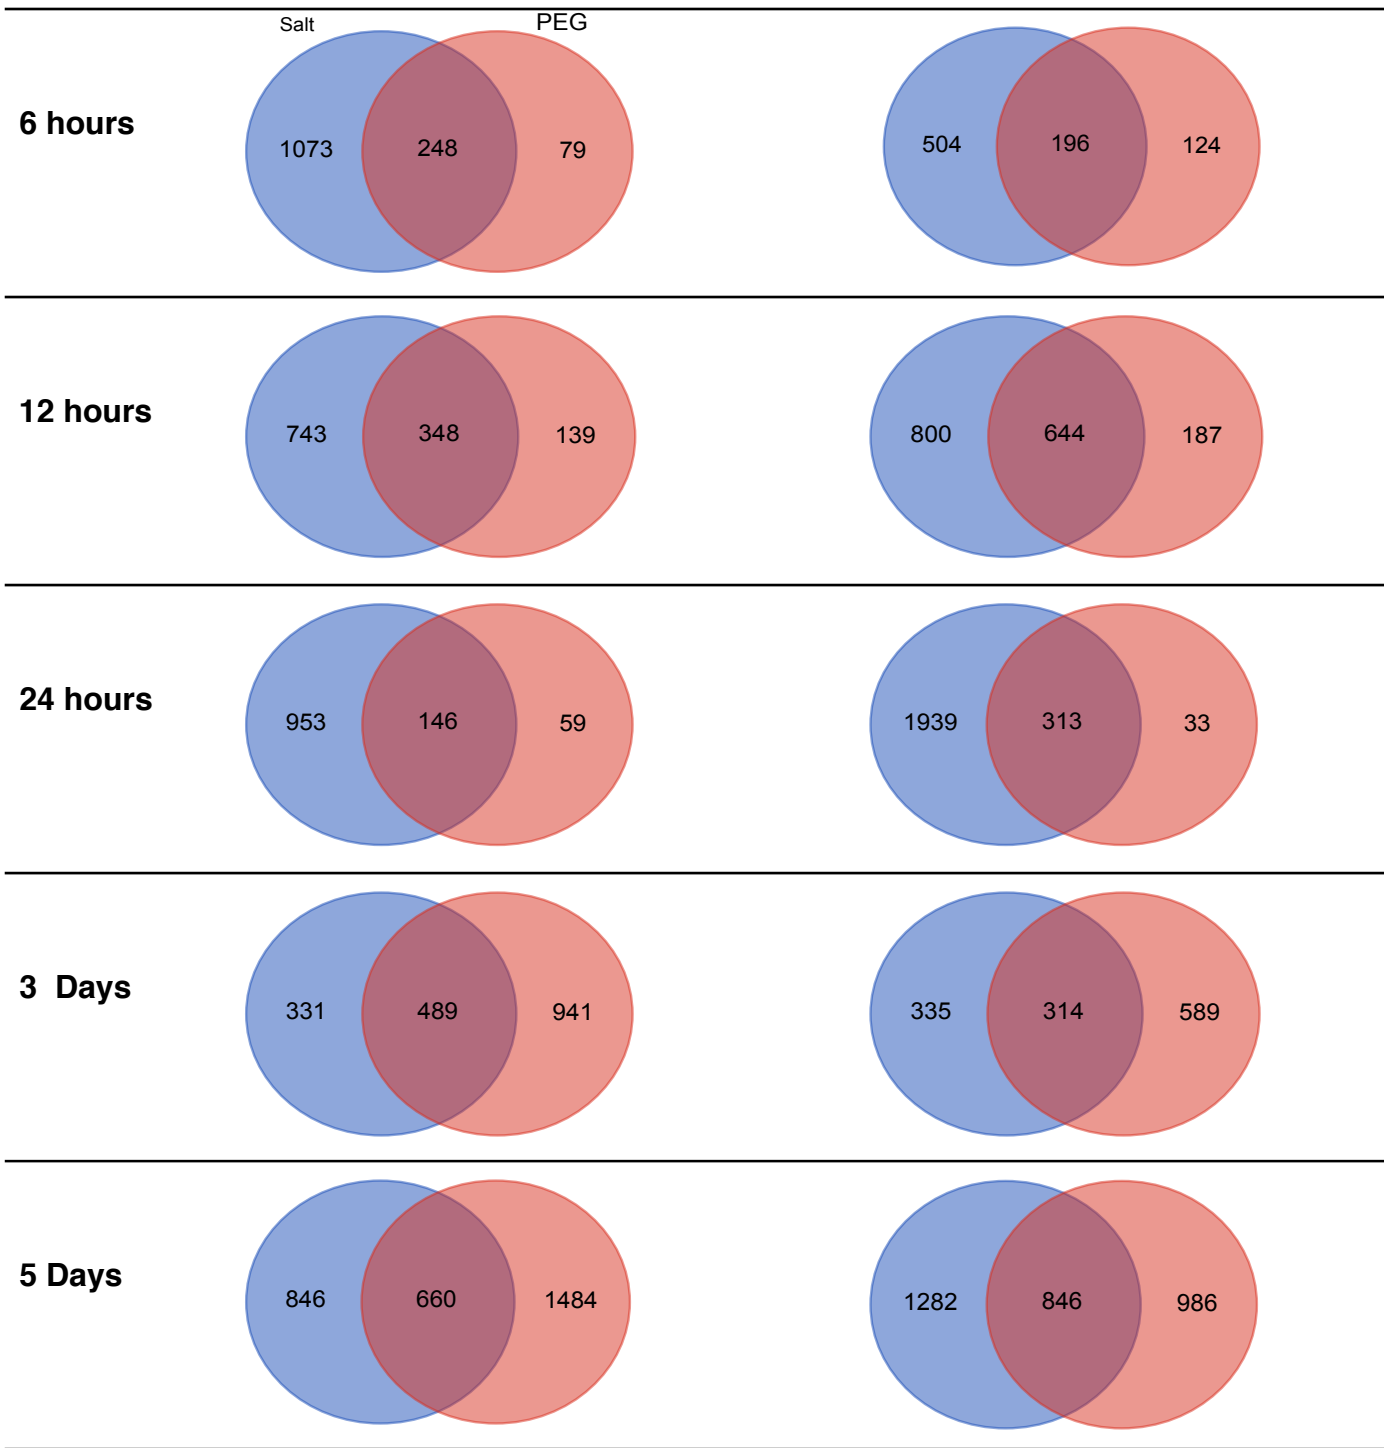

Supplement: 12870_2017_1155_MOESM3_ESM.pdf [file 12870_2017_1155_MOESM3_ESM.pdf]
